# Supplementary material
Source: publisher site journal article supplement (https://www.kjim.org/upload/media/kjim-2023-189-Supplementary-Fig-1.pdf)

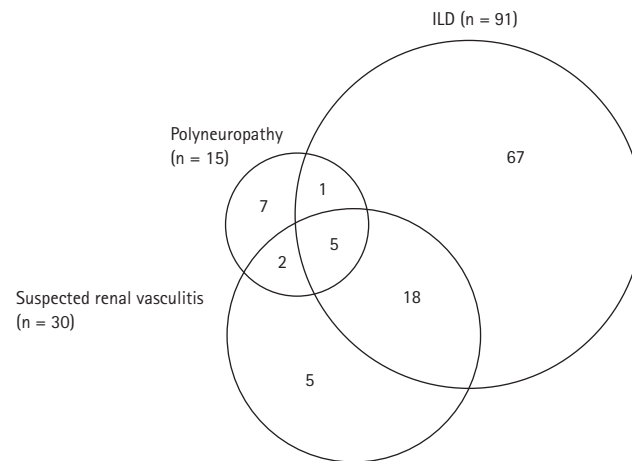

**Supplementary Figure 1.** Signs suggestive of small- or medium-vessel vasculitis.

Supplement: Supplementary file 1 [file kjim-2023-189-Supplementary-Fig-1.pdf]
